# Supplementary material for: Small Extracellular Vesicles from Head and Neck Squamous Cell Carcinoma Cells Carry a Proteomic Signature for Tumor Hypoxia
Source: MDPI journal article supplement (doi:10.3390/cancers13164176), 2021-08-19
Supplement: s1 [file s1]

# Small Extracellular Vesicles from Head and Neck Squamous Cell Carcinoma Cells Carry a Proteomic Signature for Tumor Hypoxia

Alicja Głuszko, Mirosław J. Szczepański, Theresa L. Whiteside, Torsten E. Reichert, Jacek Siewiera and Nils Ludwig

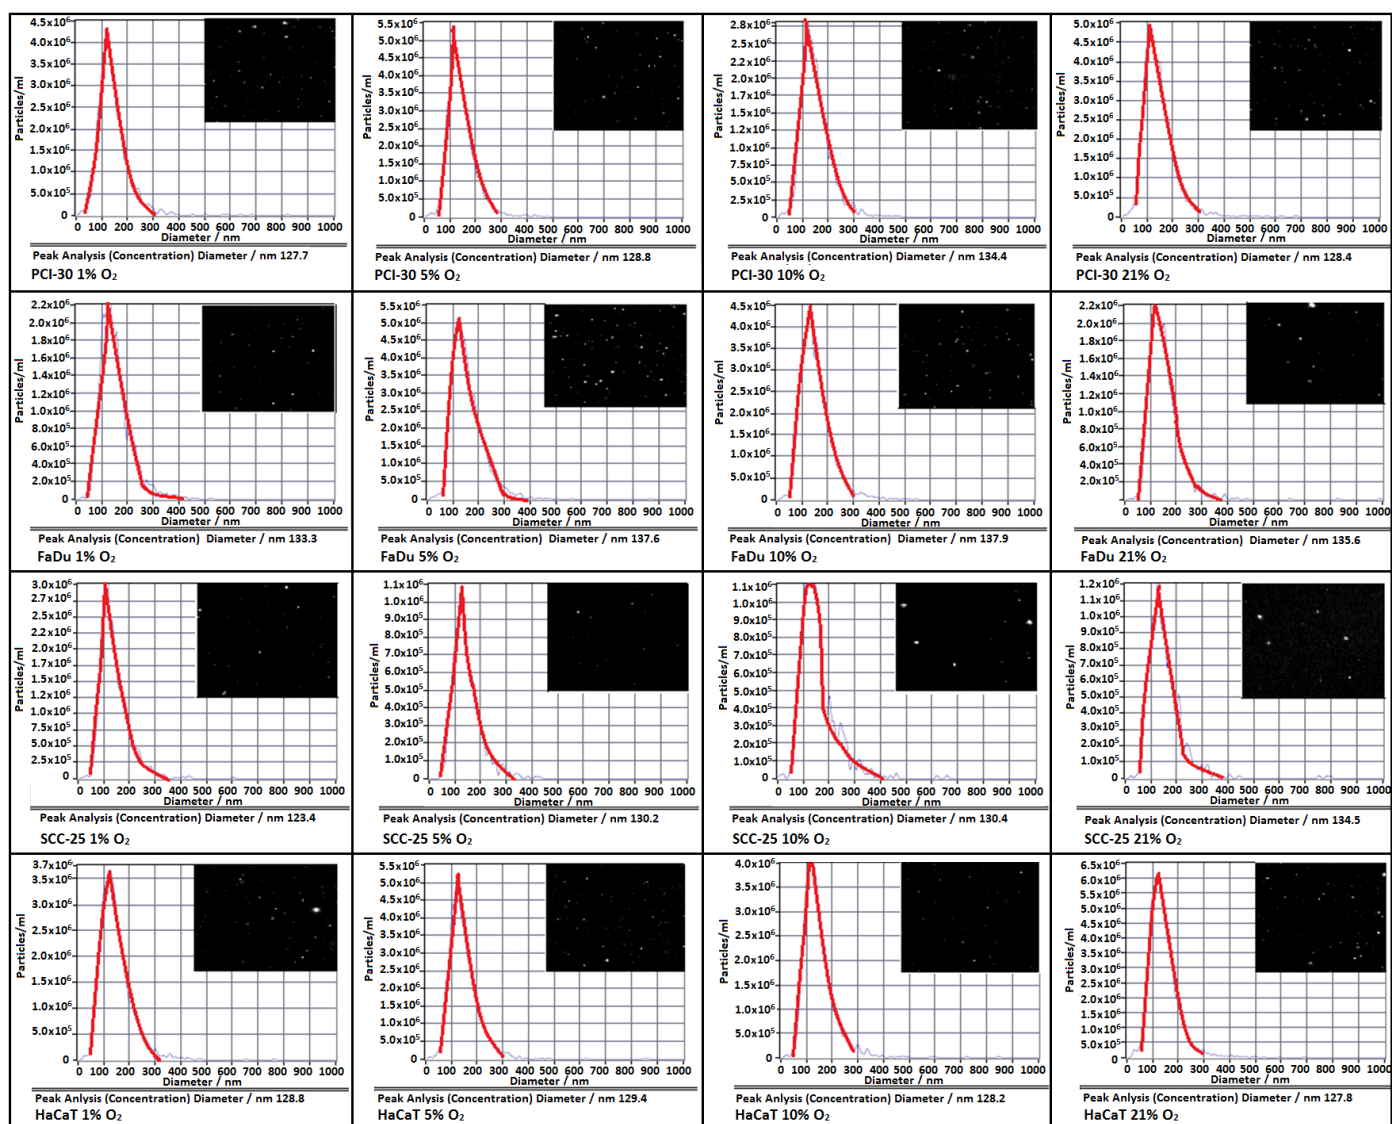

**Figure S1.** Representative concentration and size distribution plot of HNSCC and HaCaT-derived sEVs measured by nanoparticle tracking analysis (NTA) and particle visualization based on brownian motions. Particle concentration and diameter related to normoxic (21% O<sub>2</sub>) and hypoxic (1% O<sub>2</sub>, 5% O<sub>2</sub>, 10% O<sub>2</sub>) conditions.

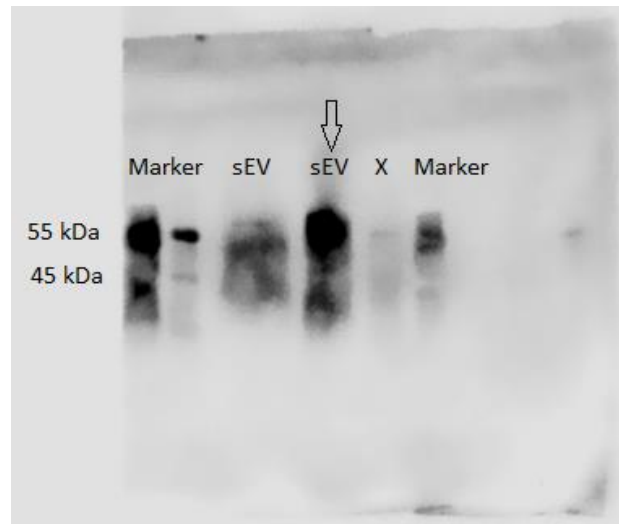

**Figure S2.** Whole blot image of CD63 western blot shown in Figure 1C. Arrow indicates the lane presented in Figure 1C.

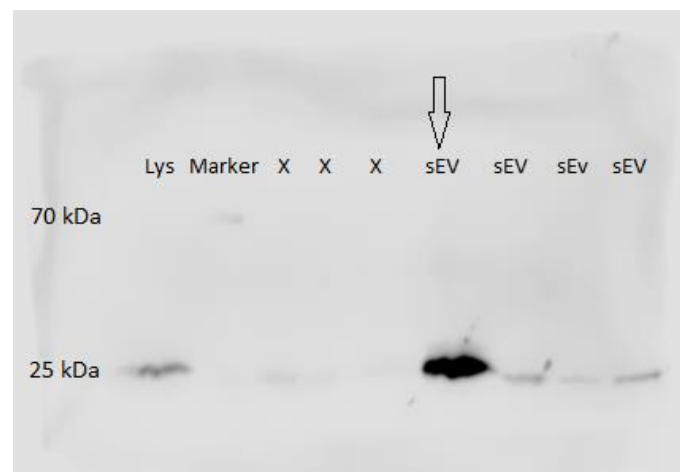

**Figure S3.** Whole blot image of CD9 western blot shown in Figure 1C. Arrow indicates the lane presented in Figure 1C.

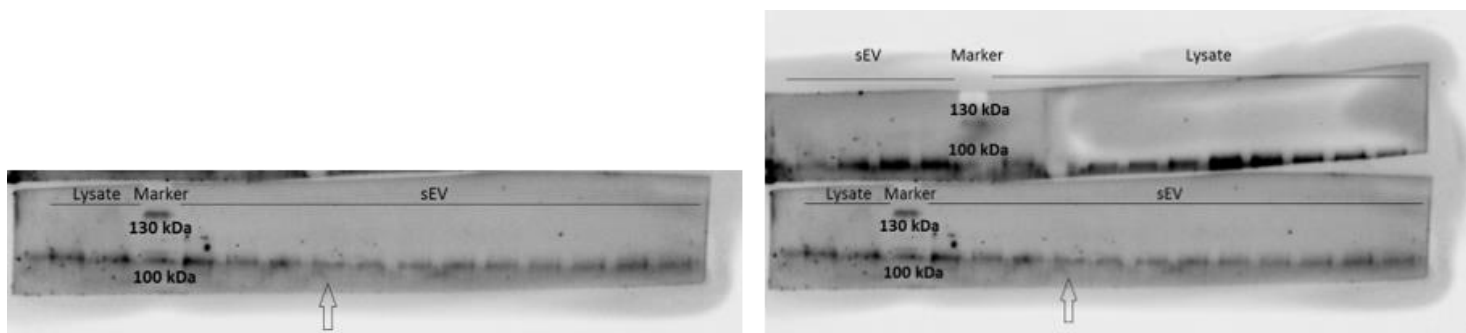

**Figure S4.** Whole blot image of Grp94 western blot shown in Figure 1C. Arrow indicates the lane presented in Figure 1C.

**Table S1.** Overview of the selected HNSCC cell lines with regards to anatomical sites of origin, estimated annual number of incidences, clinical and molecular characteristics concerning response to anti-angiogenic therapies.

| HNSCC Cell Lines | Anatomical Site of Origin/Annual Number of Incidences | Aggressiveness/TNM stage/Characteristic                | EGFR Expression/EGFR-Dependent Cell-Mediated Cytotoxicity | VEGFRs Expression/Response to VEGF Targeting Anti-Angiogenic Therapies | References |
|------------------|-------------------------------------------------------|--------------------------------------------------------|-----------------------------------------------------------|------------------------------------------------------------------------|------------|
| <b>FaDu</b>      | Hypopharynx/84,254                                    | High-/Fast growing, highly invasive, forms large tumor | Differently high/high resistance                          | Positive/increased VEGF level                                          | [1–5]      |
| <b>PCI-30</b>    | Oral cavity/377,713                                   | High/T3N1M0/Fast growing, highly invasive              | Differently high/susceptible                              | -/-                                                                    | [1,5–7]    |
| <b>SCC-25</b>    | Oral cavity/377,713                                   | Low/T2N1/Slowly growing, less invasive                 | Differently high/intermediate sensitivity                 | Positive, strong/-                                                     | [1,4,5,8]  |

TNM—Tumor size Nodus Metastases classification; T3N1M0—Tumor size 3, Nodus 1, Metastases 0 scale; T2N1—Tumor size 2, Nodus 1 scale; EGFR—Epidermal Growth Factor Receptor; VEGFR—Vascular Endothelial Growth Factor Receptor; VEGF—Vascular Endothelial Growth Factor.

**Table S2.** Profile of all proteins of small extracellular vesicles (sEVs) in indicated degrees of hypoxia. Kruskal-Wallis test was used to compare the difference in intensities between oxygenation groups of their expression vs. normoxia. To isolate differences between groups Benjamini-Krieger-Yekutieli two-stage linear step-up procedure was performed. Differences were considered significant at  $*p < 0.05$ .

| Hypoxia Signatures                                                                            |                                                                |                   |                                                               |                   |                                                               |
|-----------------------------------------------------------------------------------------------|----------------------------------------------------------------|-------------------|---------------------------------------------------------------|-------------------|---------------------------------------------------------------|
| 10% O <sub>2</sub>                                                                            |                                                                | 5% O <sub>2</sub> |                                                               | 1% O <sub>2</sub> |                                                               |
| Protein Name                                                                                  | <i>p</i> value<br>(10% O <sub>2</sub> vs. 21% O <sub>2</sub> ) | Protein Name      | <i>p</i> value<br>(5% O <sub>2</sub> vs. 21% O <sub>2</sub> ) | Protein Name      | <i>p</i> value<br>(1% O <sub>2</sub> vs. 21% O <sub>2</sub> ) |
| Proteins common in sEVs from FaDu, PCI-30, and SCC-25 and common in all degrees of hypoxia    |                                                                |                   |                                                               |                   |                                                               |
| STON1                                                                                         | 0.4280                                                         | STON1             | 0.1742                                                        | STON1             | 0.7341                                                        |
| PCLO                                                                                          | 0.3082                                                         | PCLO              | 0.3082                                                        | PCLO              | >0.9099                                                       |
| CCD25                                                                                         | 0.1742                                                         | CCD25             | 0.9099                                                        | CCD25             | 0.9099                                                        |
| K1C9                                                                                          | 0.0894                                                         | K1C9              | 0.4969                                                        | K1C9              | 0.5713                                                        |
| K2C5                                                                                          | 0.4969                                                         | K2C5              | 0.4280                                                        | K2C5              | 0.9099                                                        |
| K1C10                                                                                         | 0.7341                                                         | K1C10             | 0.2575                                                        | K1C10             | 0.3082                                                        |
| ACTBL                                                                                         | 0.6506                                                         | ACTBL             | 0.4280                                                        | ACTBL             | 0.4280                                                        |
| CCD87                                                                                         | 0.9099                                                         | CCD87             | 0.9099                                                        | CCD87             | 0.8208                                                        |
| ALBU                                                                                          | 0.9099                                                         | ALBU              | 0.6506                                                        | ALBU              | 0.7341                                                        |
| K2C1                                                                                          | >0.9999                                                        | K2C1              | 0.2129                                                        | K2C1              | 0.7341                                                        |
| Proteins common in sEVs from FaDu, PCI-30, and SCC-25 and common in 10% and 5% O <sub>2</sub> |                                                                |                   |                                                               |                   |                                                               |
| CLCF1                                                                                         | 0.1712                                                         | CLCF1             | 0.1382                                                        | -                 | -                                                             |
| TBCD1                                                                                         | 0.4248                                                         | TBCD1             | 0.6483                                                        | -                 | -                                                             |
| Proteins common in sEVs from FaDu, PCI-30, and SCC-25 and common in 5% and 1% O <sub>2</sub>  |                                                                |                   |                                                               |                   |                                                               |
| -                                                                                             | -                                                              | FETUA             | 0.8208                                                        | FETUA             | >0.9999                                                       |
| -                                                                                             | -                                                              | DLG5              | 0.6506                                                        | DLG5              | 0.1742                                                        |
| Proteins common in sEVs from FaDu, PCI-30, and SCC-25 and common in 10% and 1% O <sub>2</sub> |                                                                |                   |                                                               |                   |                                                               |
| K22E                                                                                          | 0.4969                                                         |                   |                                                               | K22E              | 0.7341                                                        |
| SNX29                                                                                         | 0.4280                                                         |                   |                                                               | SNX29             | 0.8208                                                        |
| AHNK                                                                                          | >0.9999                                                        |                   |                                                               | AHNK              | 0.6506                                                        |
| ACTB                                                                                          | 0.1382                                                         |                   |                                                               | ACTB              | 0.1104                                                        |
| S2542                                                                                         | 0.9097                                                         |                   |                                                               | S2542             | >0.9999                                                       |
| HBB                                                                                           | 0.4802                                                         |                   |                                                               | HBB               | 0.6827                                                        |
| G3P                                                                                           | 0.5713                                                         |                   |                                                               | G3P               | 0.5713                                                        |
| ABHD8                                                                                         | 0.4610                                                         |                   |                                                               | ABHD8             | 0.6914                                                        |
| Proteins common in sEVs from FaDu, PCI-30, and SCC-25 and only common in 10% O <sub>2</sub>   |                                                                |                   |                                                               |                   |                                                               |
| ANO1                                                                                          | 0.8627                                                         |                   |                                                               |                   |                                                               |
| CE350                                                                                         | 0.0603                                                         |                   |                                                               |                   |                                                               |
| NRBF2                                                                                         | 0.0257 *                                                       |                   |                                                               |                   |                                                               |
| NSUN4                                                                                         | 0.1340                                                         | -                 | -                                                             | -                 | -                                                             |
| K1C14                                                                                         | 0.1382                                                         |                   |                                                               |                   |                                                               |
| KT33B                                                                                         | 0.0164 *                                                       |                   |                                                               |                   |                                                               |
| HORN                                                                                          | 0.1383                                                         |                   |                                                               |                   |                                                               |
| Proteins common in sEVs from FaDu, PCI-30, and SCC-25 and only common in 5% O <sub>2</sub>    |                                                                |                   |                                                               |                   |                                                               |
|                                                                                               |                                                                | TRI18             | 0.8196                                                        |                   |                                                               |
|                                                                                               |                                                                | TRY3              | 0.8205                                                        |                   |                                                               |
| -                                                                                             | -                                                              | ZN714             | 0.3043                                                        | -                 | -                                                             |
|                                                                                               |                                                                | VAT1              | 0.9097                                                        |                   |                                                               |
|                                                                                               |                                                                | AL1B1             | 0.0838                                                        |                   |                                                               |
| Proteins common in sEVs from FaDu, PCI-30, and SCC-25 and only common in 1% O <sub>2</sub>    |                                                                |                   |                                                               |                   |                                                               |
|                                                                                               |                                                                |                   |                                                               | TRFL              | 0.7732                                                        |
|                                                                                               |                                                                |                   |                                                               | HBA               | 0.9092                                                        |
|                                                                                               |                                                                |                   |                                                               | PI3R4             | 0.8196                                                        |
|                                                                                               |                                                                |                   |                                                               | CTL1              | 0.0137 *                                                      |
|                                                                                               |                                                                |                   |                                                               | K2C8              | 0.0698                                                        |
| -                                                                                             | -                                                              | -                 | -                                                             | TLL1              | 0.9038                                                        |
|                                                                                               |                                                                |                   |                                                               | FGFR2             | 0.8196                                                        |
|                                                                                               |                                                                |                   |                                                               | DKK2              | >0.9999                                                       |
|                                                                                               |                                                                |                   |                                                               | CCD73             | 0.8196                                                        |
|                                                                                               |                                                                |                   |                                                               | STON2             | 0.0184 *                                                      |
|                                                                                               |                                                                |                   |                                                               | SHRM3             | 0.5261                                                        |

sEVs—small extracellular vesicles; FaDu, PCI-30, SCC-25—Head and Neck Squamous Cell Carcinoma cell lines.

## References

1. Lin, C.J.; Grandis, J.R.; Carey, T.E.; Gollin, S.M.; Whiteside, T.L.; Koch, W.M.; Ferris, R.L.; Lai, S.Y. Head and neck squamous cell carcinoma cell lines: established models and rationale for selection. *Head Neck*. **2007**; *29*, 63–88.
2. Patel, N.; Able, S.; Allen, D.; Fokas, E.; Cornelissen, B.; Gleeson, F.V.; Harris, A.L.; Vallis, K.A. Monitoring response to anti-angiogenic mTOR inhibitor therapy in vivo using (111)In-bevacizumab. *EJNMMI Res*. **2017**; *7*, 49.
3. Kalinowski, F.C.; Giles, K.M.; Candy, P.A.; Ali, A.; Ganda, C.; Epis, M.R.; Webster, R.J.; Leedman, P.J. Regulation of epidermal growth factor receptor signaling and erlotinib sensitivity in head and neck cancer cells by miR-7. *PLoS One*. **2012**; *7*, e47067.
4. Lalla, R.V.; Boissonneau, D.S.; Spiro, J.D.; Kreutzer, D.L. Expression of vascular endothelial growth factor receptors on tumor cells in head and neck squamous cell carcinoma. *Arch Otolaryngol Head Neck Surg*. **2003**; *129*, 882–888.
5. GLOBOCAN. Cancer Today: Estimated number of incident cases worldwide, both sexes, all ages. Available online: [https://gco.iarc.fr/today/online-analysis-multi-bars?v=2020&mode=cancer&mode\\_population=countries&population=900&populations=900&key=total&sex=0&cancer=39&type=0&statistic=5&prevalence=0&population\\_group=0&ages\\_group%5B%5D=0&ages\\_group%5B%5D=17&nb\\_items=55&group\\_cancer=1&include\\_nmsc=1&include\\_nmsc\\_other=1&type\\_multiple=%257B%2522inc%2522%253Atrue%252C%2522mort%2522%253Afalse%252C%2522prev%2522%253Afalse%252D&orientation=horizontal&type\\_sort=0&type\\_nb\\_items=%257B%2522top%2522%253Atrue%252C%2522bottom%2522%253Afalse%252D](https://gco.iarc.fr/today/online-analysis-multi-bars?v=2020&mode=cancer&mode_population=countries&population=900&populations=900&key=total&sex=0&cancer=39&type=0&statistic=5&prevalence=0&population_group=0&ages_group%5B%5D=0&ages_group%5B%5D=17&nb_items=55&group_cancer=1&include_nmsc=1&include_nmsc_other=1&type_multiple=%257B%2522inc%2522%253Atrue%252C%2522mort%2522%253Afalse%252C%2522prev%2522%253Afalse%252D&orientation=horizontal&type_sort=0&type_nb_items=%257B%2522top%2522%253Atrue%252C%2522bottom%2522%253Afalse%252D) (accessed on 13 Aug 2021).
6. Szczepanski, M.J.; Czystowska, M.; Szajnik, M.; Harasymczuk, M.; Boyiadzis, M.; Kruk-Zagajewska, A.; Szyfter, W.; Zeromski, J.; Whiteside, T.L. Triggering of Toll-like receptor 4 expressed on human head and neck squamous cell carcinoma promotes tumor development and protects the tumor from immune attack. *Cancer Res*. **2009**; *69*, 3105–3113.
7. Lopez-Albaitero, A.; Lee, S.C.; Morgan, S.; Grandis, J.R.; Gooding, W.E.; Ferrone, S.; Ferris, R.L. Role of polymorphic Fc gamma receptor IIIa and EGFR expression level in cetuximab mediated, NK cell dependent in vitro cytotoxicity of head and neck squamous cell carcinoma cells. *Cancer Immunol Immunother*. **2009**; *58*, 1853–1864.
8. Dourado, M.R.; Korvala, J.; Astrom, P.; De Oliveira, C.E.; Cervigne, N.K.; Mofatto, L.S.; Campanella Bastos, D.; Pereira Messetti, A.C.; Graner, E.; Paes Leme, A.F. et al. Extracellular vesicles derived from cancer-associated fibroblasts induce the migration and invasion of oral squamous cell carcinoma. *J Extracell Vesicles*. **2019**; *8*, 1578525.

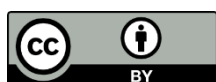

© 2021 by the authors. Licensee MDPI, Basel, Switzerland. This article is an open access article distributed under the terms and conditions of the Creative Commons Attribution (CC BY) license (<http://creativecommons.org/licenses/by/4.0/>).
